# Supplementary material for: Discussion of parameters used to distinguish suitable from less suitable HLRW bentonites
Source: Copernicus journal article supplement (doi:10.5194/sand-1-125-2021), 2021-11-10
Supplement: Supplementary file 1 [file sand-1-125-2021-supplement.pdf]

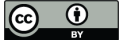

*Supplement of*

## **Discussion of parameters used to distinguish suitable from less suitable HLRW bentonites**

**Stephan Kaufhold**

*Correspondence to:* Stephan Kaufhold (s.kaufhold@bgr.de)

The copyright of individual parts of the supplement might differ from the article licence.

# Discussion of parameters which can be used to distinguish suitable from less suitable HLRW bentonites

Bentonite will be used as geotechnical barrier mostly in crystalline rocks

Bentonite:  
backfill + blocks

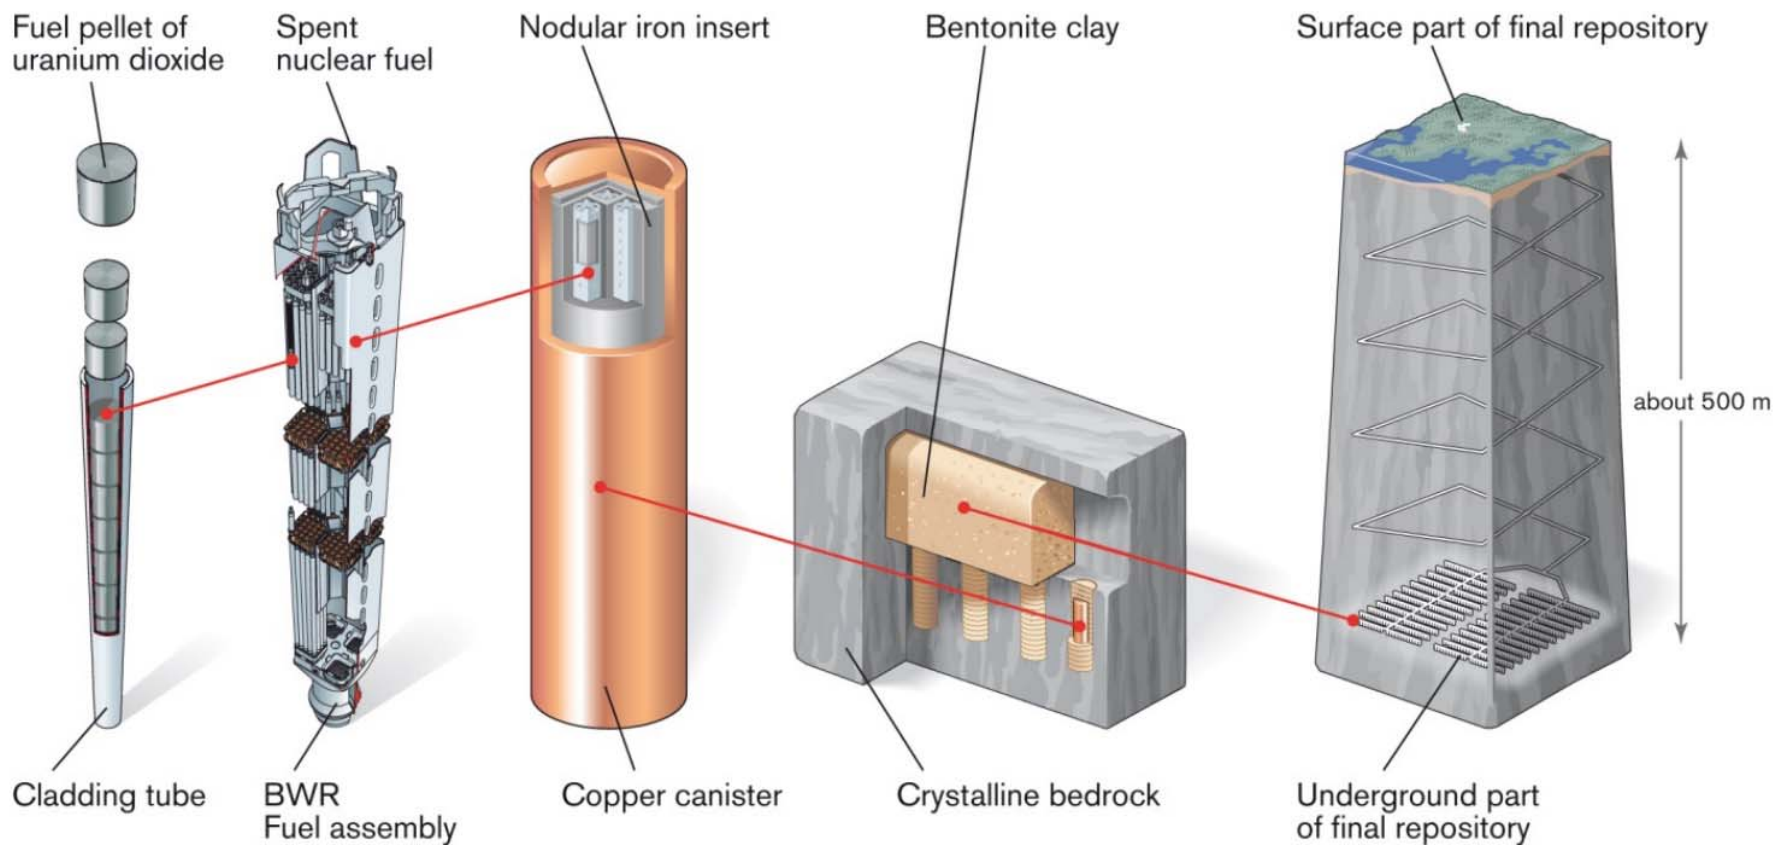

KBS-3 concept (SKB)

# Discussion of parameters which can be used to distinguish suitable from less suitable HLRW bentonites

Most relevant: geotechnical barrier  
(compacted bentonite blocks to seal canister from crystalline rock)

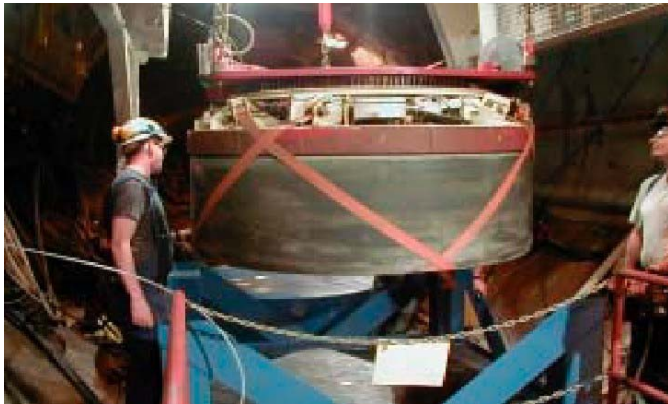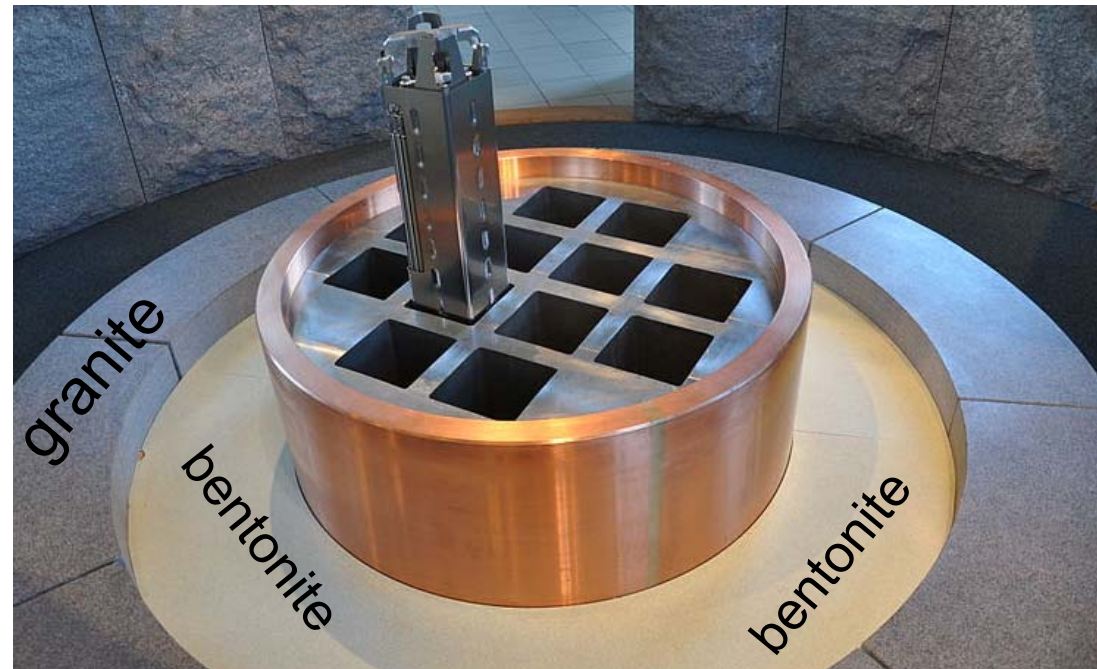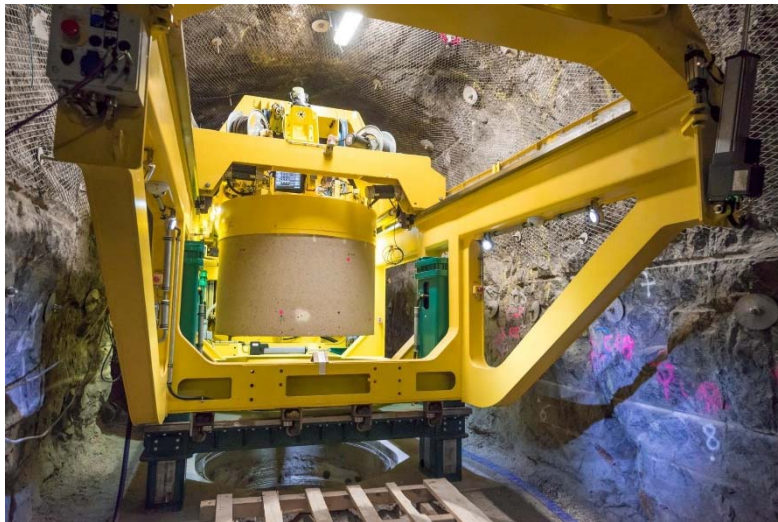

# Discussion of parameters which can be used to distinguish suitable from less suitable HLRW bentonites

Why bentonite ?

Bentonite = swelling clay = low hydraulic conductivity

since decades: sealing of landfills, contaminated sites, groundwater,...

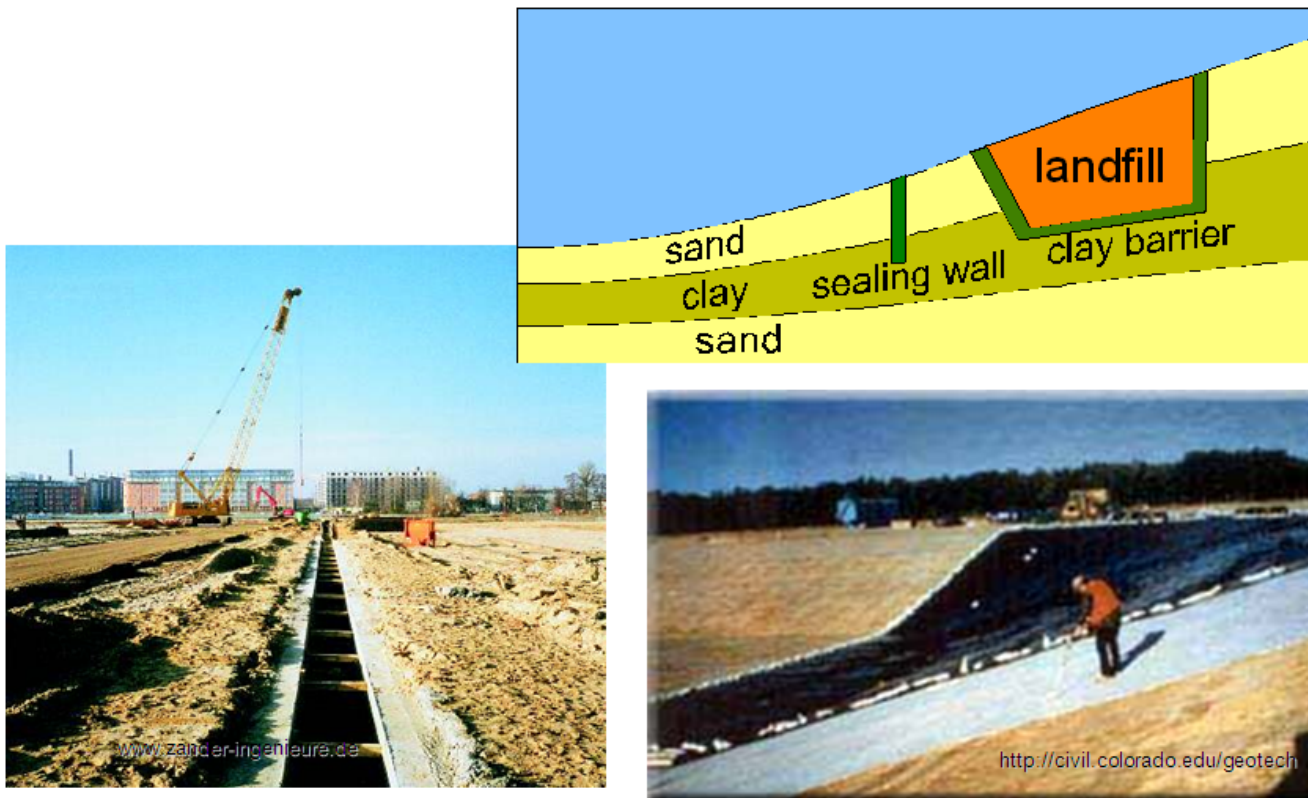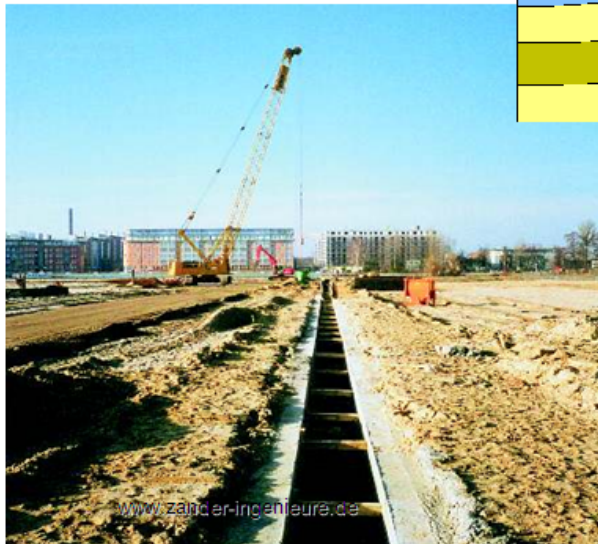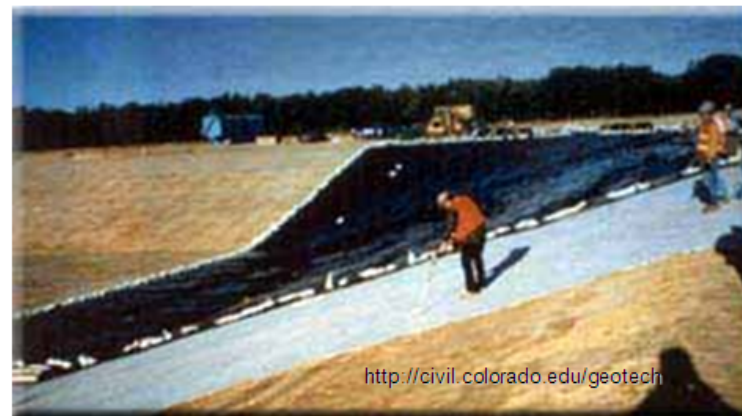

## Discussion of parameters which can be used to distinguish suitable from less suitable HLRW bentonites

SKB started to systematically investigate bentonite as possible HLRW-barrier more than 40 years ago !

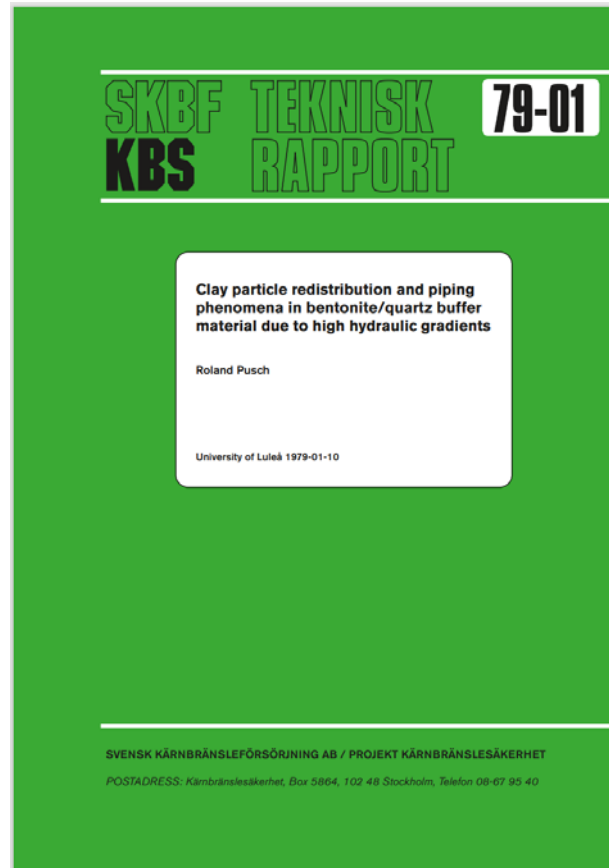

...and the possible problems / challenges of this new application

# Discussion of parameters which can be used to distinguish suitable from less suitable HLRW bentonites

Desired / required properties of the bentonite barrier?

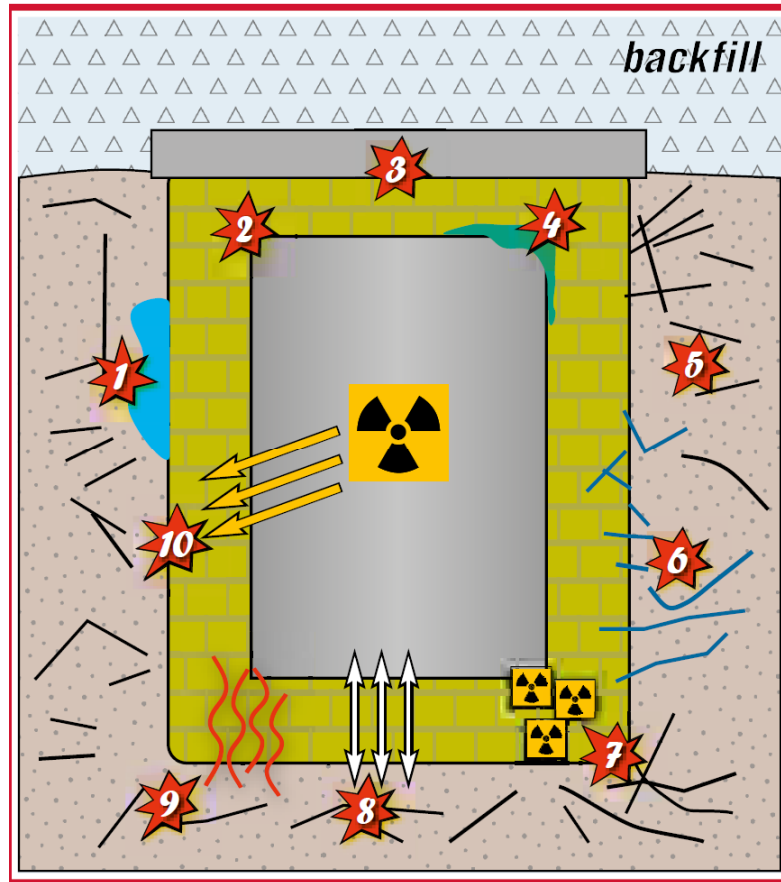

- 1 Sealing (swelling capacity)
- 2 Stability: Drying (T)
- 3 Stability: Cement water
- 4 Corrosion
- 5 Erosion
- 6 Stability: Salt solutions
- 7 Retention (radionuclide adsorption)
- 8 Canister displacement
- 9 Thermal conductivity
- 10 Stability: Radiation

Kaufhold, S. ed. (2021) Bentonites – from mine to application. – Geologisches Jahrbuch B 107, Schweizerbart, ISBN 978-3-510-96859-6. Online accessible: <https://doi.org/10.1127/bentonites/9783510968596>

# Discussion of parameters which can be used to distinguish suitable from less suitable HLRW bentonites

Problem: Bentonite is a highly variable natural material !!

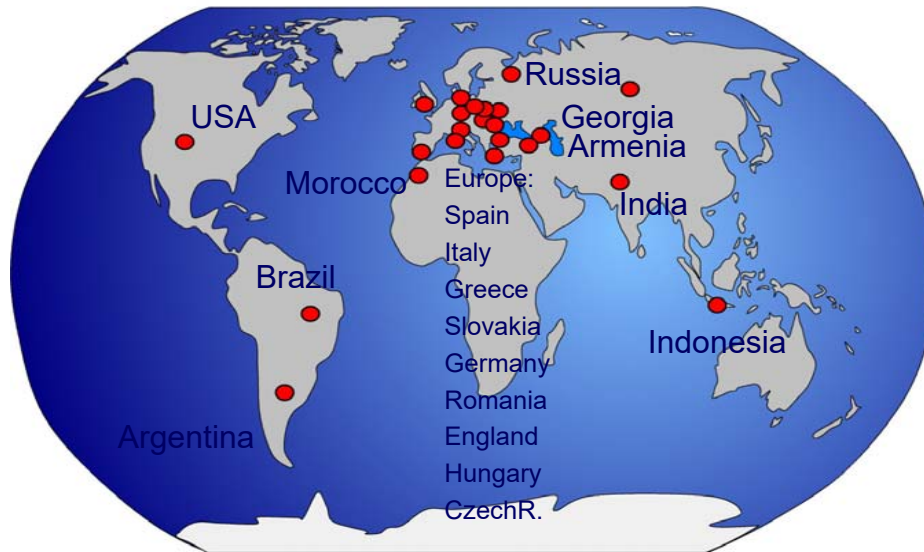

BGR:  
 Comparison of 38 different bentonite samples from all over the world  
 + large scale tests  
 ABM, LOT, PTR, FEBEX, HotBent,...

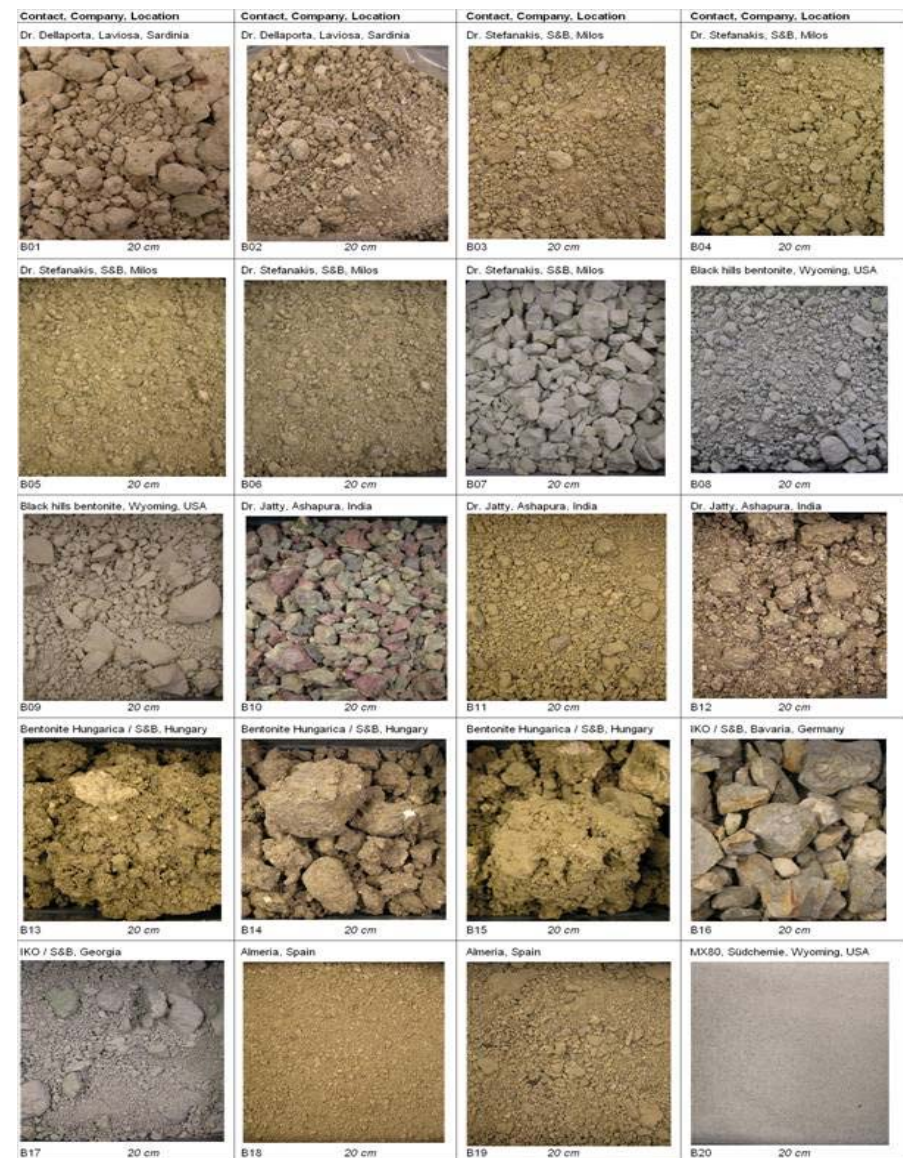

## Discussion of parameters which can be used to distinguish suitable from less suitable HLRW bentonites

Which bentonite is most suitable??

Some properties depend more on compaction than on type of material (no suitable criteria for bentonite selection)

Higher compaction:

higher dry density

+ lower hydraulic conductivity (sealing)

+ less canister displacement

+ higher thermal conductivity

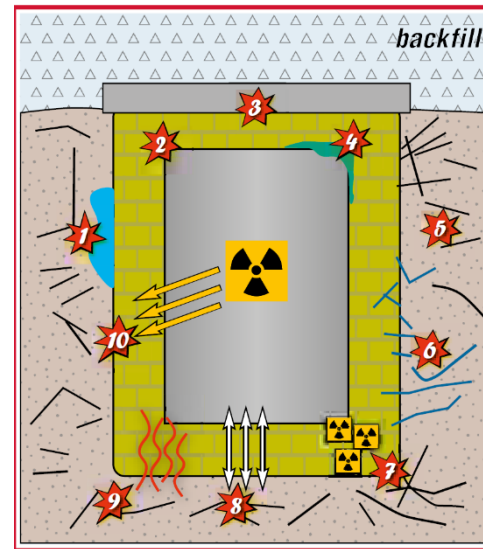

- 2 Stability: Drying (T)
- 3 Stability: Cement water
- 4 Corrosion
- 5 Erosion
- 6 Stability: Salt solutions
- 7 Retention (radionuclide adsorption)
- 10 Stability: Radiation



# Discussion of parameters which can be used to distinguish suitable from less suitable HLRW bentonites

## Stability Drying

High temperature = cation fixation =  
loss of swelling capacity

not specific for different bentonites  
Kaufhold & Dohrmann (2010)



- 3 opal +
- 4 Corrosion
- 5 Erosion
- 6 Stability: Salt solutions
- 7 Retention (radionuclide adsorption)
- 10 Stability: Radiation

## Stability Cement (Kaufhold et al., 2020)

Highly alkaline cement solutions dissolve bentonite

Reactive silica (opal) present in some bentonites buffers the pH

Kaufhold, S., Dohrmann, R. (2010) Effect of extensive drying on the cation exchange capacity of bentonites. – Clay Minerals, Vol. 45, No. 4, p. 441 – 448.

Kaufhold, S., Dohrmann, R., Ufer, K. (2020) Determining the extent of bentonite alteration at the bentonite/cement interface. – Applied Clay Science 186, 105446.

# Discussion of parameters which can be used to distinguish suitable from less suitable HLRW bentonites

## Corrosion (Fe)

Kaufhold et al. (2015)

Low charge = high corrosion

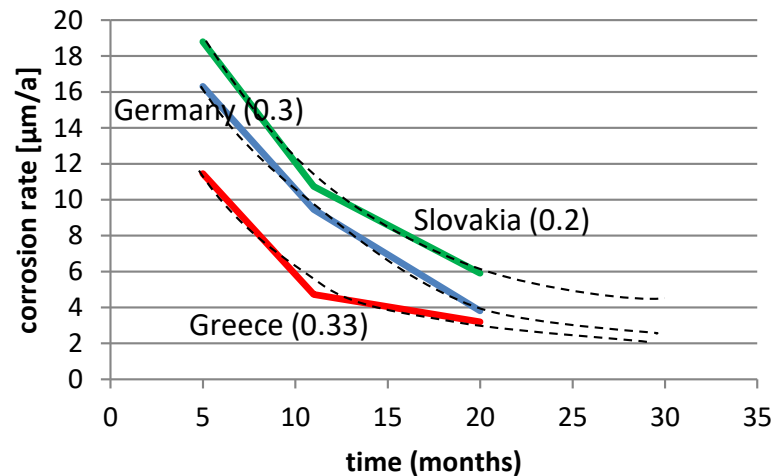

rate: 2 – 5 µm/a

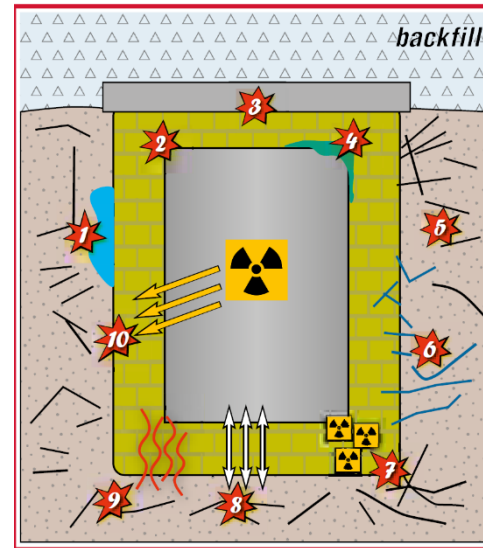

- 3 opal + pyrite – charge +
- 4 charge +
- 5 Erosion
- 6 Stability: Salt solutions
- 7 Retention (radionuclide adsorption)
- 10 Stability: Radiation

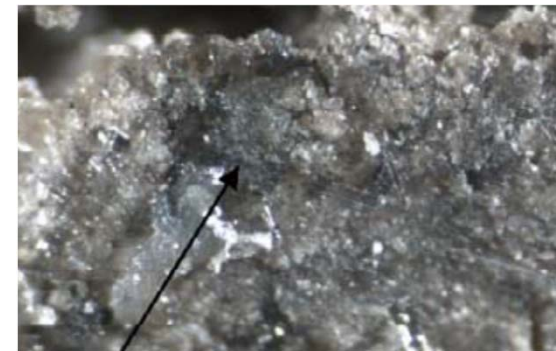

Corrosion (Cu) Kaufhold & Dohrmann (2017):  
only pyrite interacts with copper

Kaufhold, S., Sanders, D., Dohrmann, R., Hassel, A.-W. (2015) Fe corrosion in contact with bentonites. – Journal of Hazardous Materials, 285, 464–473.

Kaufhold, S., Dohrmann, R., Gröger-Trampe, J. (2017) Reaction of native copper in contact with pyrite and bentonite in anaerobic water at elevated temperature. – Corr. Eng. Sci. and Tech., 52, 349 – 358.

# Discussion of parameters which can be used to distinguish suitable from less suitable HLRW bentonites

## Erosion

Kaufhold Dohrmann (2008)

High Na-content = high erosion

Kaufhold et al. (2021)

Cation exchange is fast and cannot be avoided

=> No reasonable criteria



opal +  
pyrite –  
charge +

3

4

6

7

10

Stability: Salt solutions

Retention  
(radionuclide adsorption)

Stability: Radiation

Kaufhold, S., Dohrmann, R. (2008) Detachment of colloidal particles from bentonites in water. - Applied Clay Science, 39, p. 50–59.

Kaufhold, S., Dohrmann, R., Ufer, K., Svensson, D., Sellin, P. (2021) Mineralogical Analysis of Bentonite from the ABM5 Heater Experiment at Äspö Hard Rock Laboratory, Sweden. - Minerals 2021, 11, 669

# Discussion of parameters which can be used to distinguish suitable from less suitable HLRW bentonites

## Stability salt solutions

Kaufhold & Dohrmann (2009, 2010),  
Kaufhold et al. (2019)

Complex interaction with clay  
minerals – poorly understood...

Reactive (partly soluble) phases  
should be absent

No pyrite, no calcite, no gypsum, no  
organic matter



opal +  
pyrite –  
charge +  
cal/gyp –  
om –

7 Retention  
(radionuclide adsorption)

10 Stability: Radiation

Kaufhold, S., Dohrmann, R. (2009) Stability of bentonites in salt solutions I sodium chloride. – Applied Clay Science, 45, 3, p. 171 – 177.

Kaufhold, S., Dohrmann, R. (2010) Stability of bentonites in salt solutions II. Potassium chloride solution — Initial step of illitization? – Applied Clay Science, 49, 98 – 107.

Kaufhold, S., Dohrmann, R., Degtjarev, A., Koeniger, P., Post, V. (2019) Mg and silica release in short-term dissolution tests in bentonites. - Applied Clay Science 172, 106–114.

# Discussion of parameters which can be used to distinguish suitable from less suitable HLRW bentonites

## Radionuclide adsorption

Different radionuclides have different properties, bentonites cannot adsorb all

=> focus on the most hazardous?

$I^{129}$  is considered one of the most hazardous – not retained by pure bentonite

Bentonite can be modified with respect to adsorption of specific radionuclides (Kaufhold et al., 2007), but no generally applicable criteria



opal +  
pyrite –  
charge +  
cal/gyp –  
om -

10 Stability: Radiation

Kaufhold, S., Pohlmann-Lortz, M., Dohrmann, R., Nüesch, R. (2007) About the possible upgrade of bentonite with respect to iodide retention capacity. - Applied Clay Science, 35, 39–46

## Discussion of parameters which can be used to distinguish suitable from less suitable HLRW bentonites

Stability against radiation

Fe rich bentonites are more affected by radiation



- opal +
- pyrite –
- 3 charge +
- 4 cal/gyp –
- 6 om –
- 10 Fe –

Kaufhold, S., Dohrmann, R. (2016) Distinguishing between more and less suitable bentonites for storage of high-level radioactive waste. – Clay Minerals, 51, 289-302.

# Discussion of parameters which can be used to distinguish suitable from less suitable HLRW bentonites

## Selection of suitable bentonites

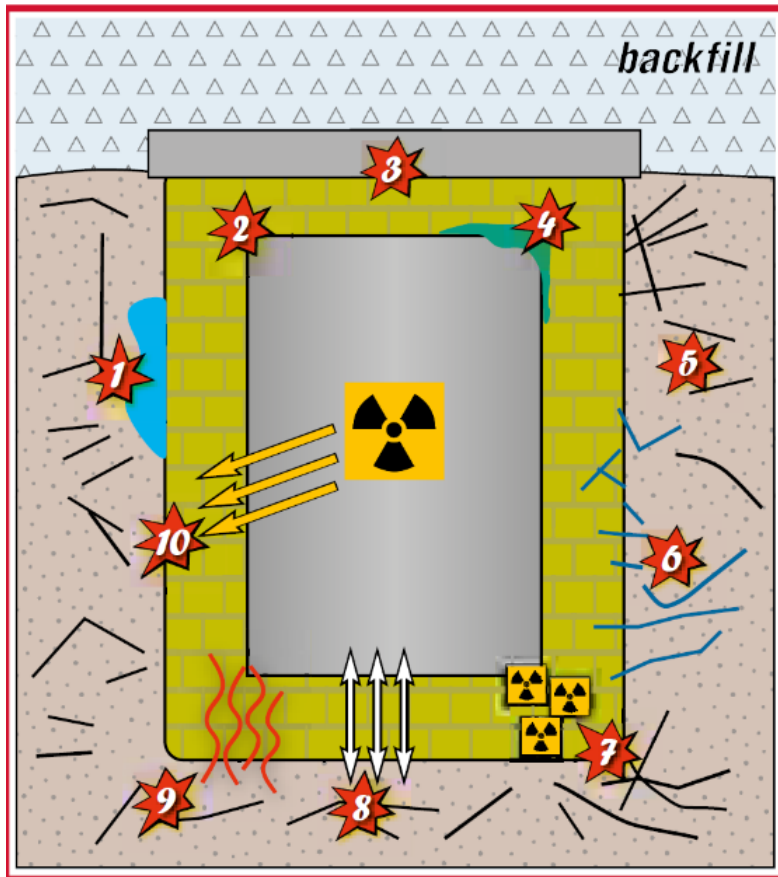

### Positive

- |                                                                                                                                                   |                                                                                                                                                                                  |
|---------------------------------------------------------------------------------------------------------------------------------------------------|----------------------------------------------------------------------------------------------------------------------------------------------------------------------------------|
| <p><b>3</b> Stability: Cement water</p> <p><b>4</b> Corrosion</p> <p><b>6</b> Stability: Salt solutions</p> <p><b>10</b> Stability: Radiation</p> | <p>presence of some opal</p> <p>low pyrite, high charge</p> <p>presence of opal?carb?</p> <p>low pyrite,<br/>low calcite<br/>low gypsum<br/>low organic matter</p> <p>low Fe</p> |
|---------------------------------------------------------------------------------------------------------------------------------------------------|----------------------------------------------------------------------------------------------------------------------------------------------------------------------------------|

Currently: use domestic bentonite or buy MX80 (Wyoming bentonite)

No bentonite selection decision taken yet (even not Posiva)

thanks

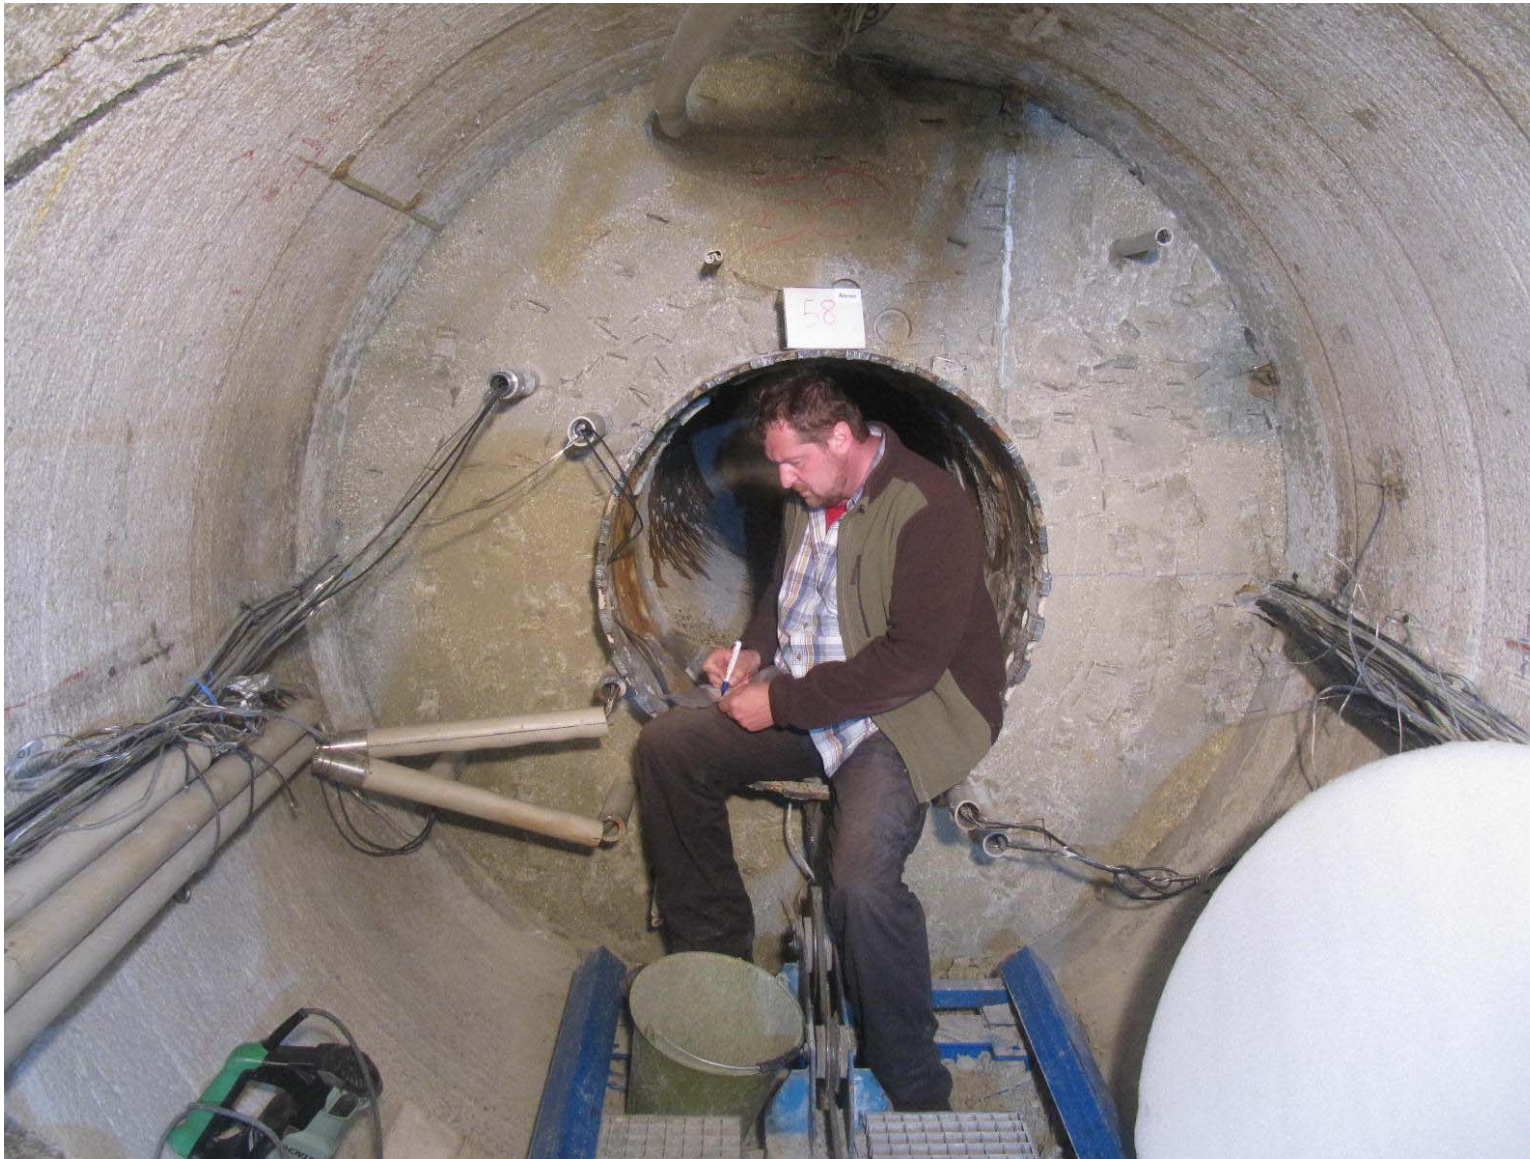

*Dr. S. Kaufhold*
